# Supplementary material
Source: publisher figshare collection journal article supplement (https://karger.figshare.com/articles/dataset/_/28782785)
Supplement: Supplementary file 1 [file 1]

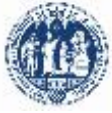

## INFORMATIONEN ÜBER DIE TEILNAHME AN DER STUDIE

### **Erhebung des aktuellen Status etablierter Communication-Skills-Trainings (CSTs) an onkologischen Zentren in Deutschland**

DRKS00027225

Vielen Dank, dass Sie sich Zeit für unsere etwa 3 – 15minütige online-Befragung nehmen!

Auftraggeber der Studie und/oder Studienleitung ist / die Gesamtverantwortung für die Studie liegt bei:

**Prof. Dr. med. Christian Albus**  
**Klinik und Poliklinik für Psychosomatik und Psychotherapie**  
**Postanschrift: Universitätsklinikum Köln (AöR), 50924 Köln**  
**Tel +49-221-478-39555; -39556**  
**Fax +49-221-478-39563**  
**[christian.albus@uk-koeln.de](mailto:christian.albus@uk-koeln.de)**

Zum Hintergrund: Zahlreiche Studien belegen den Nutzen von Kommunikationstrainings (CSTs) für onkologisch Behandelnde. Entsprechend finden sich in allen relevanten Leitlinien Empfehlungen zur routinemäßigen Implementierung von CSTs. Allerdings ist unklar, wie der Stand in Deutschland ist. Ziel der Befragung ist eine systematische Erfassung der Verbreitung etablierter CST-Angebote in Deutschland. Zusätzlich sollen mögliche Stärken und Defizite in Bezug auf CST-Angebote und Vorschläge zur Verbesserung benannt werden.

Es handelt sich um einen Online-Fragebogen, der mithilfe des Tools SoSciSurvey erstellt wurde. SoSciSurvey hat seinen Server-Standort in München; IP-Adressen werden standardmäßig nicht gespeichert. Eventuell wird bei weiterem Informationsbedarf ein auf den Fragebogen folgendes Interview mit Ihnen durchgeführt, um weitere Fragen zu klären; Die Teilnahme an diesem ist freiwillig; Sie werden zunächst nach ihrem Einverständnis gefragt und im Weiteren zur Angabe von persönlichen Daten (Name, Abteilung, E-Mail, Telefonnummer) zwecks Kontaktaufnahme aufgefordert.

Für den Erfolg der Erhebung ist es sehr wichtig, dass alle Sie bzw. Ihre Klinik betreffenden Fragen des Online-Fragebogens vollständig ausgefüllt werden.

Die insgesamt Anzahl teilnehmender Zentren beläuft sich auf 133.

Die Finanzierung erfolgt aus Eigenmitteln.

Die Ethikkommission der Medizinischen Fakultät zu Köln hat die vorliegende Studie am 20.06.2022 beraten und zustimmend bewertet.

Die Teilnahme an der Studie ist für Sie mit keinen medizinischen Risiken verbunden. Es erfolgen keine

studienbedingten Maßnahmen. Eine Aufwandsentschädigung wird Ihnen für Ihre Teilnahme an der Studie nicht gezahlt. Es entstehen Ihnen und Ihrer Krankenkasse auch keinerlei Kosten durch die Teilnahme an der Studie.

Sie werden möglicherweise keinen persönlichen Nutzen durch die Teilnahme an der Studie haben. Man erhofft sich jedoch einen Nutzen für die Wissenschaft und die zukünftige Behandlung von Patienten mit Krebserkrankungen.

## DATENSCHUTZHINWEIS

Es handelt sich um eine potentiell zweistufige Befragung, wobei Ihre Daten im ersten Teil (online-Fragebogen) anonym erhoben werden; erfragt wird lediglich der Name des onkologischen Zentrums, an dem Sie beschäftigt sind. Die zweite Stufe (Interview) ist optional und erfolgt nur dann, wenn Sie uns hierfür ihr Einverständnis geben und uns freiwillig Ihre Kontaktdaten am Ende des Fragebogens hinterlassen. Vor der Durchführung des Interviews werden wir zwecks einer gesonderten

Informations- und Einwilligungserklärung mit allen hierzu erforderlichen Informationen erneut mit Ihnen in Kontakt treten. Zu diesem Zeitpunkt werden Sie sich frei entscheiden können. Ihre Angaben aus dem Interview werden pseudonymisiert ausgewertet.

Die Rechtsgrundlage für die Datenverarbeitung ist Ihre freiwillige Einwilligung.

Alle Ihre Angaben werden von uns streng vertraulich behandelt. Ihre Angaben werden vor dem Zugriff Dritter angemessen geschützt und nach den Bestimmungen der Datenschutzgrundverordnung (DSGVO) verarbeitet. Ihre Teilnahme und die etwaige Angabe persönlicher Daten im Rahmen dieser Umfrage erfolgt freiwillig. Ihre Angaben aus dem online-Fragebogen werden zunächst auf dem Server des "SocSciSurvey" (Serverstandort: München) gespeichert und anschließend an die zuständigen Projektmitarbeiter\*innen am Universitätsklinikum Köln (AöR) (UKK) weitergeleitet. Ihre Angaben aus dem optionalen Interview werden direkt am UKK gespeichert. Eine Weitergabe Ihrer Angaben an Dritte außerhalb des UKK erfolgt nur anonymisiert und zum Zwecke der wissenschaftlichen Auswertung und Veröffentlichung. Ihre personenbezogenen Informationen werden nur zur etwaigen Kontaktaufnahme genutzt und verbleiben im UKK; diese gehen nicht in die Verarbeitung der Angaben im Fragebogen mit ein.

Das UKK verarbeitet die Sie betreffenden Daten im Rahmen des Projektes "Erhebung etablierter Communication-Skills-Trainings (CSTs) an onkologischen Zentren in Deutschland" zum Zwecke der weiteren Forschung. Die Daten werden bis 2 Jahre nach Beendigung des Projektes aufbewahrt. Im Anschluss werden Ihre Daten gelöscht oder anonymisiert, sofern gesetzliche Gründe nicht eine längere Speicherung vorschreiben. Anonymisiert heißt, dass der Zuordnungscode gelöscht wird und die Daten ggf. so weiter verändert werden, dass sie in keiner Weise Ihrer Person zugeordnet werden können. Sie haben das Recht auf Auskunft (einschließlich unentgeltlicher Überlassung einer Kopie), Berichtigung, Löschung und Einschränkung der Verarbeitung, ohne dass die Rechtmäßigkeit der aufgrund der Einwilligung is zum Widerruf erfolgten Verarbeitung berührt wird, sowie ein Widerrufsrecht gegen die weitere Verarbeitung das Recht auf Datenübertragbarkeit und ein Beschwerderecht gegenüber der zuständigen Aufsichtsbehörde (vgl. Art. 13 Abs. 2 lit. b, Art. 15, Art. 16, Art. 17, Art. 18 DSGVO).

Wissenschaftliche Veröffentlichungen von Ergebnissen erfolgen ausschließlich anonymisiert, also in einer Form, die keine Rückschlüsse auf Ihre Person zulässt.

Die Anschrift der zuständigen Aufsichtsbehörde lautet:

Datenschutzbeauftragter des Studienzentrums:

*Datenschutzbeauftragter der Universität zu Köln:*

[dsb@verw.uni-koeln.de](mailto:dsb@verw.uni-koeln.de)  
0221-470-0

*Datenschutzbeauftragter der Uniklinik Köln:*

[datenschutz@uk-koeln.de](mailto:datenschutz@uk-koeln.de)  
0221-478-39046

Sie haben außerdem ein Beschwerderecht bei jeder Aufsichtsbehörde für den Datenschutz.

Eine Liste der Aufsichtsbehörden in Deutschland finden Sie unter

[https://www.bfdi.bund.de/DE/Infothek/Anschriften\\_Links/anschriften\\_links-node.html](https://www.bfdi.bund.de/DE/Infothek/Anschriften_Links/anschriften_links-node.html)

Ihre Einwilligung erfolgt freiwillig und kann von Ihnen jederzeit gemäß Art. 7 Abs. 3 DSGVO durch Erklärung gegenüber des Datenschutzbeauftragten der UKK ohne Angaben von Gründen schriftlich widerrufen werden. Ihre Teilnahme an dieser Studie ist freiwillig. Sie werden in diese Studie also nur dann einbezogen, wenn Sie dazu schriftlich Ihre Einwilligung erklären. Sofern Sie nicht an der Studie teilnehmen oder später Ihre Einwilligung

widerrufen, entstehen Ihnen daraus keine Nachteile.

Bei jeder Erhebung, Speicherung, Nutzung und Übermittlung von Daten bestehen Vertraulichkeitsrisiken (z.B. die Möglichkeit, die betreffende Person zu identifizieren). Diese Risiken lassen sich nicht völlig ausschließen und steigen, je mehr Daten miteinander verknüpft werden können. Der Auftraggeber der Studie/der Studienleiter versichert Ihnen, alles nach dem Stand der Technik Mögliche zum Schutz Ihrer Privatsphäre zu tun und Daten nur an Stellen weiterzugeben, die ein geeignetes Datenschutzkonzept vorweisen können. Medizinische Risiken sind mit der Datenverarbeitung nicht verbunden.

Sollten Sie noch weitere Fragen zum Ablauf der Studie, zum Datenschutz, zu Ihren Rechten, usw. haben wenden Sie sich bitte an einen der Studienärzte. Die Kontaktdaten finden Sie auf der ersten Seite.

Ich habe diese Informationen sorgfältig gelesen und bin mit der Erhebung und Verwendung meiner Daten nach Maßgabe der Teilnehmerinformation einverstanden.

**Bitte erklären Sie jetzt Ihr Einverständnis, um mit der Befragung beginnen zu können.**

☐ Ich erkläre mich einverstanden.

---

**Seite 02**

**1. In welcher Institution, bzw. welchem onkologischem Zentrum sind Sie zurzeit tätig?**

**Bitte den Namen und Ort des Zentrums angeben:**

---

**Seite 03**

Angebot

**2. Gibt es an Ihrem onkologischen Zentrum ein Angebot für die Ärzte/Ärztinnen, Gesundheits- und Krankenpfleger\*innen und/oder sonstige Berufsgruppen, an einem Kommunikationstraining für den onkologischen Alltag teilzunehmen?**

Wenn es sowohl regelhafte als auch projektbezogene Angebote gibt, kreuzen Sie bitte beide Möglichkeiten an.

- ☐ nein
- ☐ ja, regelhaft
- ☐ ja, projektbezogen (z.B.: im Rahmen einer wissenschaftlichen Studie, Industrie-Sponsoring...)

Sie haben angegeben, dass in Ihrem Zentrum ein **regelmäßiges** Kommunikationstraining angeboten wird. Die folgende Fragen bezieht sich nur auf dieses regelmäßige Training:

### 3. Für welche Berufsgruppe(n) wird dieses regelmäßige Kommunikationstraining angeboten?

Handelt es sich um mehrere, nach Berufsgruppe getrennte Trainings, kreuzen Sie bitte alle Berufsgruppen an, denen ein solches Training angeboten wird. Werden verschiedene Berufsgruppen zusammen geschult, so kreuzen Sie bitte „Interprofessionelles Training“ an.

☐ Ärzt\*innen

☐ Gesundheits- und Krankenpfleger\*innen

Sonstige Berufsgruppen:

☐

Interprofessionelles Training (mindestens zwei Berufsgruppen); wenn ja, welche Berufsgruppen können teilnehmen?

☐

Sie haben angegeben, dass in Ihrem Zentrum ein Kommunikationstraining **für Ärzt\*Innen** angeboten wird. Die folgenden Fragen beziehen sich nur auf das Training für diese Berufsgruppe:

### 4. Wer führt das Kommunikationstraining durch?

☐ Von der eigenen Einrichtung

☐ Von einem externen Anbieter

☐ Unbekannt

### 5. Wer finanziert den Kurs?

Mehrfachnennung möglich

☐ Arbeitgeber

☐ die Teilnehmer selbst

☐ Sonstige:

**6. Ist der Kurs für alle MitarbeiterInnen des eigenen Zentrums kostenlos?**

- ☐ ja  
☐ nein

**7. Wie oft findet dieses Kommunikationstraining statt?**

- ☐ regelmäßig; mehrmals pro Jahr  
☐ regelmäßig; einmal pro Jahr  
☐ regelmäßig; weniger als einmal pro Jahr

**8. Wie viel Unterrichtseinheiten (à 45 Minuten) nimmt der Kurs in Anspruch?**

Die gesamte Kurslänge beträgt  Unterrichtseinheiten.

**9. Wann findet der Kurs statt?**

- ☐ während der Dienstzeit und Freistellung der Teilnehmer vom Dienst  
☐ während der Dienstzeit, keine Freistellung  
☐ außerhalb der Dienstzeit, während der Freizeit  
☐ sowohl während der Dienstzeit, als auch während der Freizeit

**10. Welche pädagogischen Techniken werden im Kurs eingesetzt? (Mehrfachantwort möglich)**

Mehrfachnennung möglich

- ☐ Vortrag  
☐ Rollenspiele mit oder ohne Schauspielerpatienten  
☐ Interaktive Gruppenarbeiten  
☐ Videos mit (Schauspieler-)Patienten  
☐ Arbeit in Kleingruppen  
☐ Nutzung eigener Fallbeispiele

**11. Wird ein Auffrischkurs angeboten?**

- ☐ ja  
☐ nein

**12. Nehmen Behandelnde aus bestimmten Fachbereichen häufiger teil als aus anderen?**

- ☐ ja, besonders aus dem Fachbereich:  
  
☐ nein, alle Fachbereiche, die sich um den onkologischen Patienten kümmern, nehmen zu gleichen Teilen teil

13. Wie viele Teilnehmer nehmen durchschnittlich an einem Kurs teil?

- ☐ ≤6
- ☐ 7-12
- ☐ >12

14. Bitte geben Sie eine Abschätzung an,

a) wie viele Teilnehmer pro Jahr an diesem Kommunikationskurs teilnehmen und

b) wie Mitarbeiter insgesamt als Behandelnde im Zentrum tätig sind:

a) Anzahl der Teilnehmer:

b) Mitarbeiter insgesamt:

Seite 06

Pflege

Sie haben angegeben, dass in Ihrem Zentrum ein Kommunikationstraining **für die Gesundheits- und Krankenpfleger\*Innen** angeboten wird. Die folgenden Fragen beziehen sich nur auf das Training für diese Berufsgruppe:

15. Wer führt das Kommunikationstraining durch?

- ☐ Von der eigenen Einrichtung
- ☐ Von einem externen Anbieter
- ☐ Unbekannt

16. Wer finanziert den Kurs?

Mehrfachnennung möglich

- ☐ Arbeitgeber
- ☐ die Teilnehmer selbst
- ☐ Sonstige:

17. Ist der Kurs für alle MitarbeiterInnen des eigenen Zentrums kostenlos?

- ☐ ja
- ☐ nein

**18. Wie oft findet dieses Kommunikationstraining statt?**

- ☐ regelmäßig; mehrmals pro Jahr
- ☐ regelmäßig; einmal pro Jahr
- ☐ regelmäßig; weniger als einmal pro Jahr

**19. Wie viel Unterrichtseinheiten (à 45 Minuten) nimmt der Kurs in Anspruch?**

Die gesamte Kurslänge beträgt  Unterrichtseinheiten.

**20. Wann findet der Kurs statt?**

- ☐ während der Dienstzeit und Freistellung der Teilnehmer vom Dienst
- ☐ während der Dienstzeit, keine Freistellung
- ☐ außerhalb der Dienstzeit, während der Freizeit
- ☐ sowohl während der Dienstzeit, als auch während der Freizeit

**21. Welche pädagogischen Techniken werden im Kurs eingesetzt? (Mehrfachantwort möglich)**

Mehrfachnennung möglich

- ☐ Vortrag
- ☐ Rollenspiele mit und ohne Schauspielerpatienten
- ☐ Interaktive Gruppenarbeiten
- ☐ Videos mit (Schauspieler-)Patienten
- ☐ Arbeit in Kleingruppen
- ☐ Nutzung eigener Fallbeispiele

**22. Wird ein Auffrischkurs angeboten?**

- ☐ ja
- ☐ nein

**23. Ist das Training integriert in eine onkologische Fachweiterbildung?**

- ☐ ja
- ☐ nein

**24. Nehmen Behandelnde aus bestimmten Fachbereichen häufiger teil als aus anderen?**

☐ ja, besonders aus dem Fachbereich:

- ☐
- ☐ nein, alle Fachbereiche, die sich um den onkologischen Patienten kümmern, nehmen zu gleichen Teilen teil

**25. Wie viele Teilnehmer nehmen durchschnittlich an einem Kurs teil?**

- ☐ ≤6
- ☐ 7-12
- ☐ >12

**26. Bitte geben Sie eine Abschätzung an,**

- a) wie viele Teilnehmer pro Jahr an diesem Kommunikationskurs teilnehmen und**  
**b) wie Mitarbeiter insgesamt als Behandelnde im Zentrum tätig sind:**

a) Anzahl der Teilnehmer:

b) Mitarbeiter insgesamt:

---

**Seite 07**

Sonstig

Sie haben angegeben, dass in Ihrem Zentrum ein  
Kommunikationstraining für **sonstige Berufsgruppen** angeboten wird. Die  
folgenden Fragen beziehen sich nur auf das Training für diese Berufsgruppe:

**27. Wer führt das Kommunikationstraining durch?**

- ☐ Von der eigenen Einrichtung
- ☐ Von einem externen Anbieter
- ☐ Unbekannt

**28. Wer finanziert den Kurs?**

Mehrfachnennung möglich

- ☐ Arbeitgeber
- ☐ die Teilnehmer selbst
- ☐ Sonstige:

**29. Ist der Kurs für alle MitarbeiterInnen des eigenen Zentrums kostenlos?**

- ☐ ja
- ☐ nein



**30. Wie oft findet dieses Kommunikationstraining statt?**

- ☐ regelmäßig; mehrmals pro Jahr
- ☐ regelmäßig; einmal pro Jahr
- ☐ regelmäßig; weniger als einmal pro Jahr

**31. Wie viel Unterrichtseinheiten (à 45 Minuten) nimmt der Kurs in Anspruch?**

Die gesamte Kurslänge beträgt  Unterrichtseinheiten.

**32. Wann findet der Kurs statt?**

- ☐ während der Dienstzeit und Freistellung der Teilnehmer vom Dienst
- ☐ während der Dienstzeit, keine Freistellung
- ☐ außerhalb der Dienstzeit, während der Freizeit
- ☐ sowohl während der Dienstzeit, als auch während der Freizeit

**33. Welche pädagogischen Techniken werden im Kurs eingesetzt? (Mehrfachantwort möglich)**

Mehrfachnennung möglich

- ☐ Vortrag
- ☐ Rollenspiele mit oder ohne Schauspielerpatienten
- ☐ Interaktive Gruppenarbeiten
- ☐ Videos mit (Schauspieler-)Patienten
- ☐ Arbeit in Kleingruppen
- ☐ Nutzung eigener Fallbeispiele

**34. Wird ein Auffrischkurs angeboten?**

- ☐ ja
- ☐ nein

**35. Nehmen Behandelnde aus bestimmten Fachbereichen häufiger teil als aus anderen?**

☐ ja, besonders aus dem Fachbereich:

☐ nein, alle Fachbereiche, die sich um den onkologischen Patienten kümmern, nehmen zu gleichen Teilen teil

**36. Wie viele Teilnehmer nehmen durchschnittlich an einem Kurs teil?**

- ☐ ≤6
- ☐ 7-12
- ☐ >12

37. Bitte geben Sie eine Abschätzung an,  
a) wie viele Teilnehmer pro Jahr an diesem Kommunikationskurs teilnehmen und  
b) wie Mitarbeiter insgesamt als Behandelnde im Zentrum tätig sind:

a) Anzahl der Teilnehmer:

b) Mitarbeiter insgesamt:

Sie haben angegeben, dass in Ihrem Zentrum ein **interprofessionelles Kommunikationstraining** für mehrere Berufsgruppen **zusammen** angeboten wird. Die folgenden Fragen beziehen sich nur auf dieses interprofessionelle Training:

38. Wer führt das Kommunikationstraining durch?

- ☐ Von der eigenen Einrichtung
- ☐ Von einem externen Anbieter
- ☐ Unbekannt

39. Wer finanziert den Kurs?

Mehrfachnennung möglich

- ☐ Arbeitgeber
- ☐ die Teilnehmer selbst
- ☐ Sonstige:

40. Ist der Kurs für alle MitarbeiterInnen des eigenen Zentrums kostenlos?

- ☐ ja
- ☐ nein

41. Wie oft findet dieses Kommunikationstraining statt?

- ☐ regelhaft; mehrmals pro Jahr
- ☐ regelhaft; einmal pro Jahr
- ☐ regelhaft; weniger als einmal pro Jahr

**42. Wie viel Unterrichtseinheiten (à 45 Minuten) nimmt der Kurs in Anspruch?**

Die gesamte Kurslänge beträgt  Unterrichtseinheiten.

**43. Wann findet der Kurs statt?**

- ☐ während der Dienstzeit und Freistellung der Teilnehmer vom Dienst
- ☐ während der Dienstzeit, keine Freistellung
- ☐ außerhalb der Dienstzeit, während der Freizeit
- ☐ sowohl während der Dienstzeit, als auch während der Freizeit

**44. Welche pädagogischen Techniken werden im Kurs eingesetzt? (Mehrfachantwort möglich)**

Mehrfachnennung möglich

- ☐ Vortrag
- ☐ Rollenspiele mit oder ohne Schauspielerpatienten
- ☐ Interaktive Gruppenarbeiten
- ☐ Videos mit (Schauspieler-)Patienten
- ☐ Arbeit in Kleingruppen
- ☐ Nutzung eigener Fallbeispiele

**45. Wird ein Auffrischkurs angeboten?**

- ☐ ja
- ☐ nein

**46. Nehmen Behandelnde aus bestimmten Fachbereichen häufiger teil als aus anderen?**

- ☐ ja, besonders aus dem Fachbereich:
- ☐ nein, alle Fachbereiche, die sich um den onkologischen Patienten kümmern, nehmen zu gleichen Teilen teil

**47. Wie viele Teilnehmer nehmen durchschnittlich an einem Kurs teil?**

- ☐ ≤6
- ☐ 7-12
- ☐ >12

**48. Bitte geben Sie eine Abschätzung an,**

- a) wie viele Teilnehmer pro Jahr an diesem Kommunikationskurs teilnehmen und**
- b) wie Mitarbeiter insgesamt als Behandelnde im Zentrum tätig sind:**

a) Anzahl der Teilnehmer:

b) Mitarbeiter insgesamt:

Sie haben angegeben, dass in Ihrem Zentrum ein Kommunikationstraining **im Rahmen eines Projektes** angeboten wird. Die folgenden Fragen beziehen sich nur auf dieses projektbezogene Training:

**49. Für welche Berufsgruppen ist das projektbezogene Kommunikationstraining ausgelegt?**

☐ Ärzt\*Innen

☐ Gesundheits- und Krankenpfleger\*Innen

☐ Sonstige Berufsgruppen

**50. Wer führt das Kommunikationstraining durch?**

Mehrfachnennung möglich

☐ Von der eigenen Einrichtung

☐ Von einem externen Anbieter

☐ Unbekannt

**51. Wer finanziert den Kurs?**

Mehrfachnennung möglich

☐ Arbeitgeber

☐ die Teilnehmer selbst

☐ Finanzierung durch Wissenschaftliche Projekte

☐ Sonstige:

**52. Ist der Kurs für alle MitarbeiterInnen des eigenen Zentrums kostenlos?**

☐ ja

☐ nein

**53. Wie viel Unterrichtseinheiten (à 45 Minuten) nimmt der Kurs in Anspruch?**

Die gesamte Kurslänge beträgt  Unterrichtseinheiten.

**54. Wann findet der Kurs statt?**

- ☐ während der Dienstzeit und Freistellung der Teilnehmer vom Dienst
- ☐ während der Dienstzeit, keine Freistellung
- ☐ außerhalb der Dienstzeit, während der Freizeit
- ☐ sowohl während der Dienstzeit, als auch während der Freizeit

**55. Welche pädagogischen Techniken werden im Kurs eingesetzt? (Mehrfachantwort möglich)**

Mehrfachnennung möglich

- ☐ Vortrag
- ☐ Rollenspiele mit oder ohne Schauspielerpatienten
- ☐ Interaktive Gruppenarbeiten
- ☐ Videos mit (Schauspieler-)Patienten
- ☐ Arbeit in Kleingruppen
- ☐ Nutzung eigener Fallbeispiele

**56. Nehmen Behandelnde aus bestimmten Fachbereichen häufiger teil als aus anderen?**

- ☐ ja, besonders aus dem Fachbereich:
- ☐ nein, alle Fachbereiche, die sich um den onkologischen Patienten kümmern, nehmen zu gleichen Teilen teil

**57. Wie viele Teilnehmer nehmen durchschnittlich an einem Kurs teil?**

- ☐ ≤6
- ☐ 7-12
- ☐ >12

**58. Bitte geben Sie eine Abschätzung an,**

**a) wie viele Teilnehmer pro Jahr an diesem Kommunikationskurs teilnehmen und**

**b) wie Mitarbeiter insgesamt als Behandelnde im Zentrum tätig sind:**

a) Anzahl der Teilnehmer:

b) Mitarbeiter insgesamt:

**59. Wie sehr stimmen Sie folgender Aussage zu: „Das in meinem Zentrum angebotene Kommunikationstraining ist ausreichend für die Herausforderungen im klinisch-onkologischen Alltag.“**

- ☐ stimme voll zu
- ☐ stimme teilweise zu
- ☐ stimme nicht zu

**60. Bitte nennen Sie Gründe, die aus ihrer Sicht die Implementierung eines erfolgreichen Kommunikationstrainings hemmen (z.B. inhaltliche Vorbehalte oder finanzielle oder organisatorische Hindernisse):**

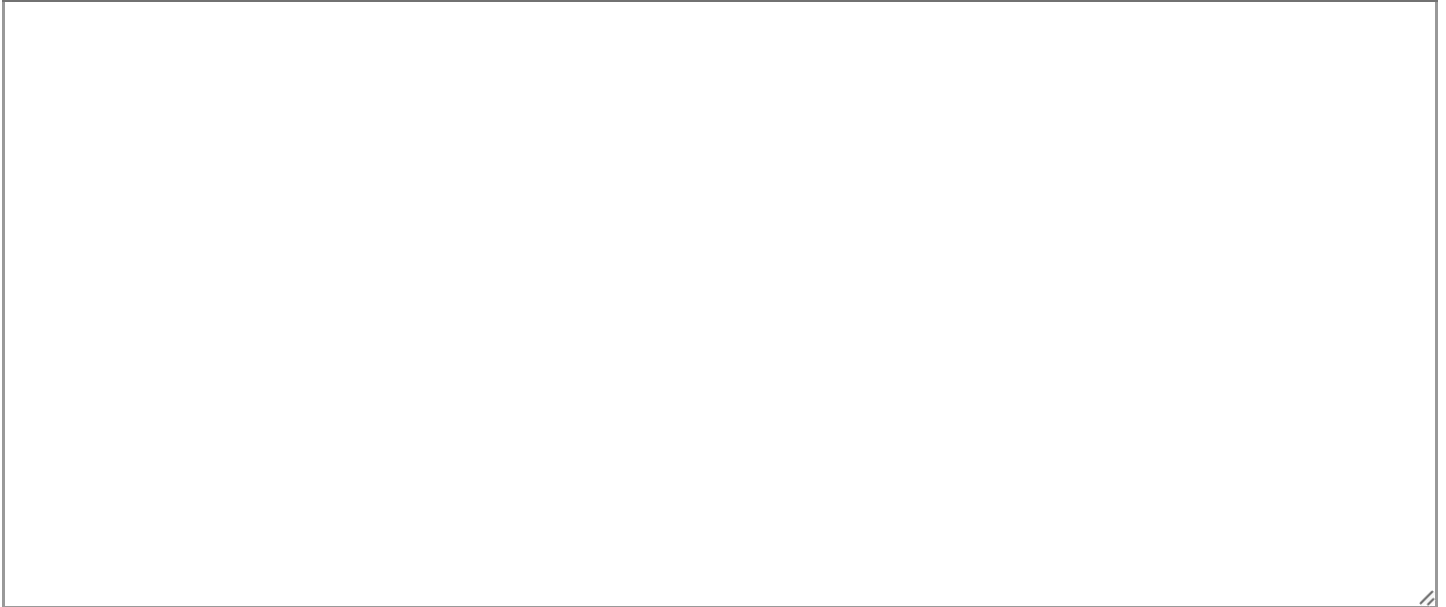

**61. Bitte geben Sie an, welche Wünsche Sie in Bezug auf Kommunikationstrainings an Ihrer Einrichtung haben; Was könnte die erfolgreiche Durchführung erleichtern?**

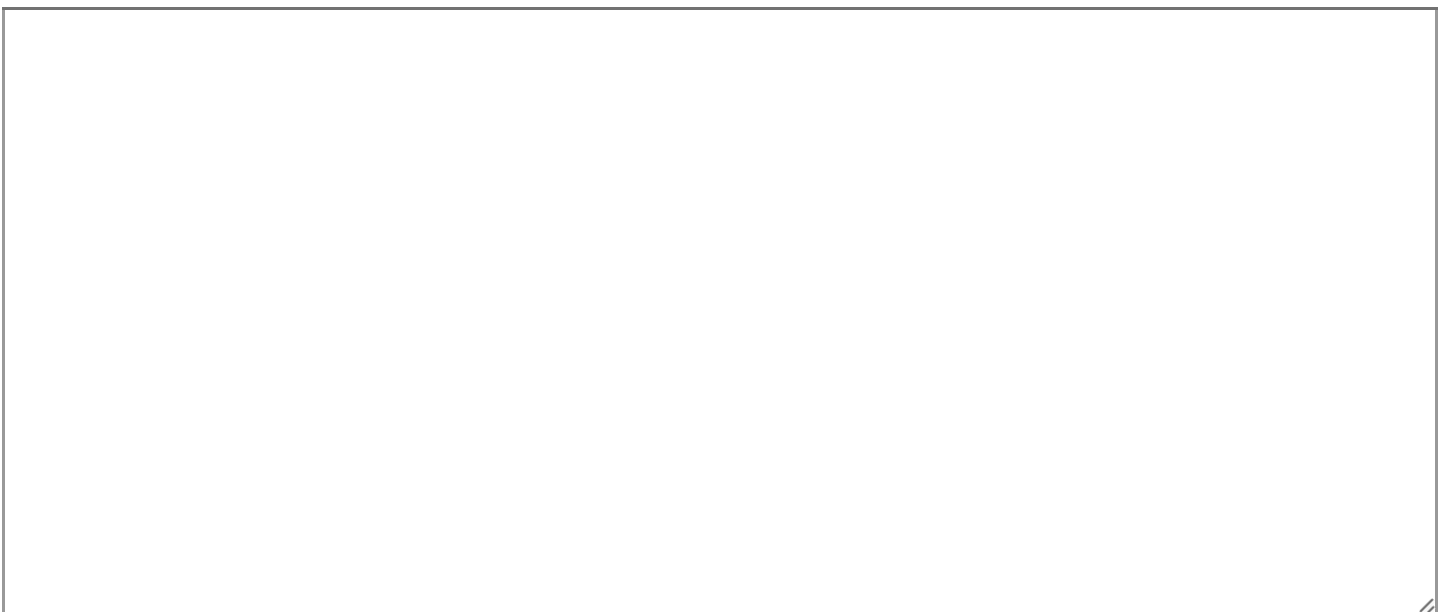

**62. Vielen Dank, dass Sie uns bereits einige Informationen über Kommunikationsstrainings an ihrem Zentrum mitgeteilt haben! Gegebenenfalls würden wir darüber hinaus noch gerne einmal persönlich mit Ihnen in Form eines kurzen Interviews in Kontakt treten.**

**Bitte geben Sie kurz an, ob Sie dazu bereit wären:**

- ☐ Ja, ich erkläre mich dazu einverstanden
- ☐ Nein, dafür stehe ich nicht bereit

**63. Unter welchen Kontaktdaten können wir Sie am besten erreichen?**

Name:

Abteilung:

E-Mail:

Telefonnummer:

Vielen Dank, die Befragung ist für Sie abgeschlossen! Impressum: Herr Prof. Dr. med. Christian Albus Universitätsklinikum Köln christian.albus@uk-koeln.de Esther-Rosa Vens-Cappell Universitätsklinikum Köln evenscap@smail.uni-koeln.de
